# Supplementary material for: Predictors of Psychological Well-Being and Quality of Life in Patients with Hypertension: A Longitudinal Study
Source: MDPI journal article supplement (doi:10.3390/healthcare12060621), 2024-03-09

**HLM Model****Level-1 Model**

$$DV_{ti} = \pi_{0i} + \pi_{1i}*(Time_{ti}) + \pi_{2i}*(SBP_{ti}) + \pi_{3i}*(DBP_{ti}) + \pi_{4i}*(Composite.Risk.Factor_{ti}) + \\ \pi_{5i}*(LoC.Internal_{ti}) + \pi_{6i}*(LoC.External_{ti}) + \pi_{7i}*(RSES_{ti}) + e_{ti}$$

**Level-2 Model**

$$\pi_{0i} = \beta_{00} + \beta_{01}*(Randomization.Group_i) + \beta_{02}*(Sex_i) + \beta_{03}*(Previous.CVD_i) + \\ \beta_{04}*(End.Organ.Damage_i) + \beta_{05}*(Number.of.AHP.drugs.taken_i) + \beta_{06}*(STAI.Y_i) + \\ \beta_{07}*(DS-14_i) + \beta_{08}*(TYPE.A_i) + r_{0i}$$

$$\pi_{1i} = \beta_{10} + \beta_{11}*(Randomization.Group_i) + \beta_{12}*(Sex_i) + \beta_{13}*(Previous.CVD_i) + \\ \beta_{14}*(End.Organ.Damage_i) + \beta_{15}*(Number.of.AHP.drugs.taken_i) + \beta_{16}*(STAI.Y_i) + \\ \beta_{17}*(DS-14_i) + \beta_{18}*(TYPE.A_i) + r_{1i}$$

$$\pi_{2i} = \beta_{20}$$

$$\pi_{3i} = \beta_{30}$$

$$\pi_{4i} = \beta_{40}$$

$$\pi_{5i} = \beta_{50}$$

$$\pi_{6i} = \beta_{60}$$

$$\pi_{7i} = \beta_{70}$$

*Note.* DV = Dependent Variable; CVD = Cardiovascular Disease; AHP = Anti-Hypertensive; STAY-Y = State Trait Anxiety Inventory, Trait subscale; DS-14 = Type D Scale 14; SBP = Systolic Blood Pressure; DBP = Diastolic Blood Pressure; LoC = Locus of Control; RSES = Rosenberg Self-Esteem Scale.

**Supplementary Table S1.**

Fixed effects of all predictors on **PGWB scores** at baseline (Intercept.2) and on its longitudinal changes over time (“Time” slope). The table further report the effects of the Time Varying Covariates (e.g., LoC and RSES) on the dependent variable.

| Fixed Effect                                 | Coefficient | SE       | <i>t</i> -ratio | <i>df</i> | <i>p</i> -value  |
|----------------------------------------------|-------------|----------|-----------------|-----------|------------------|
| For INTERCEPT.1, $\pi_0$                     |             |          |                 |           |                  |
| INTERCEPT.2, $\beta_{00}$                    | 78.715935   | 1.044419 | 75.368          | 146       | <0.001           |
| Randomization Group, $\beta_{01}$            | 1.813319    | 1.997589 | 0.908           | 146       | 0.366            |
| Sex, $\beta_{02}$                            | 0.999276    | 2.011894 | 0.497           | 146       | 0.620            |
| Previous CVD, $\beta_{03}$                   | 3.535707    | 4.633663 | 0.763           | 146       | 0.447            |
| End Organ Damage, $\beta_{04}$               | 0.378548    | 0.825420 | 0.459           | 146       | 0.647            |
| Number of AHP drugs taken, $\beta_{05}$      | -13.331651  | 8.697439 | -1.533          | 146       | 0.127            |
| <b>STAI-Y Trait, <math>\beta_{06}</math></b> | -1.141051   | 0.168836 | <b>-6.758</b>   | 146       | <b>&lt;0.001</b> |
| DS-14, $\beta_{07}$                          | 0.201411    | 0.134753 | 1.495           | 146       | 0.137            |
| Type A, $\beta_{08}$                         | -0.820250   | 0.430700 | -1.904          | 146       | 0.059            |
| For “Time” slope, $\pi_1$                    |             |          |                 |           |                  |
| INTERCEPT.2, $\beta_{10}$                    | -0.027121   | 0.027877 | -0.973          | 146       | 0.332            |
| Randomization Group, $\beta_{11}$            | 0.003979    | 0.048915 | 0.081           | 146       | 0.935            |
| Sex, $\beta_{12}$                            | 0.007735    | 0.049546 | 0.156           | 146       | 0.876            |
| Previous CVD, $\beta_{13}$                   | -0.143506   | 0.145690 | -0.985          | 146       | 0.326            |
| End Organ Damage, $\beta_{14}$               | 0.035791    | 0.017731 | 2.018           | 146       | 0.045            |
| Number of AHP drugs taken, $\beta_{15}$      | -0.052499   | 0.198078 | -0.265          | 146       | 0.791            |
| <b>STAI-Y Trait, <math>\beta_{16}</math></b> | 0.007714    | 0.003876 | <b>1.990</b>    | 146       | <b>0.048</b>     |
| DS-14, $\beta_{17}$                          | -0.004964   | 0.003443 | -1.442          | 146       | 0.152            |

|                                            |           |          |               |     |                  |
|--------------------------------------------|-----------|----------|---------------|-----|------------------|
| <b>Type A, <math>\beta_{18}</math></b>     | 0.034754  | 0.010542 | <b>3.297</b>  | 146 | <b>0.001</b>     |
| For “Clinical SBP” slope, $\pi_2$          |           |          |               |     |                  |
| INTERCEPT.2, $\beta_{20}$                  | -0.111877 | 0.055006 | -2.034        | 115 | 0.044            |
| For “Clinical DBP” slope, $\pi_3$          |           |          |               |     |                  |
| INTERCEPT.2, $\beta_{30}$                  | -0.165499 | 0.079505 | -2.082        | 115 | 0.040            |
| For “Composite Risk Factor” slope, $\pi_4$ |           |          |               |     |                  |
| INTERCEPT.2, $\beta_{40}$                  | 0.046301  | 1.039928 | 0.045         | 115 | 0.965            |
| For “ <b>Internal LoC</b> ” slope, $\pi_5$ |           |          |               |     |                  |
| INTERCEPT.2, $\beta_{50}$                  | 0.343459  | 0.133464 | <b>2.573</b>  | 115 | <b>0.011</b>     |
| For “ <b>External LoC</b> ” slope, $\pi_6$ |           |          |               |     |                  |
| INTERCEPT.2, $\beta_{60}$                  | -0.255204 | 0.082676 | <b>-3.087</b> | 115 | <b>0.003</b>     |
| For “ <b>RSES</b> ” slope, $\pi_7$         |           |          |               |     |                  |
| INTERCEPT.2, $\beta_{70}$                  | 1.083358  | 0.167101 | <b>6.483</b>  | 115 | <b>&lt;0.001</b> |

---

**Supplementary Table S2.**

Fixed effects of all predictors on **SF-36 PCS** at baseline (Intercept.2) and on its longitudinal changes over time (“Time” slope). The table further report the effects of the Time Varying Covariates (e.g., LoC and RSES) on the dependent variable.

| Fixed Effect                                 | Coefficient | SE       | <i>t</i> -ratio | <i>df</i> | <i>p</i> -value |
|----------------------------------------------|-------------|----------|-----------------|-----------|-----------------|
| For INTERCEPT.1, $\pi_0$                     |             |          |                 |           |                 |
| INTERCEPT.2, $\beta_{00}$                    | 49.210908   | 0.595315 | 82.664          | 146       | <0.001          |
| Randomization Group, $\beta_{01}$            | -0.258758   | 1.268524 | -0.204          | 146       | 0.839           |
| Sex, $\beta_{02}$                            | 4.277522    | 1.413320 | 3.027           | 146       | 0.003           |
| Previous CVD, $\beta_{03}$                   | -2.496148   | 3.068092 | -0.814          | 146       | 0.417           |
| End Organ Damage, $\beta_{04}$               | 1.110865    | 0.507715 | 2.188           | 146       | 0.030           |
| Number of AHP drugs taken, $\beta_{05}$      | -15.227654  | 4.528751 | -3.362          | 146       | <0.001          |
| STAI-Y Trait, $\beta_{06}$                   | -0.155319   | 0.088975 | -1.746          | 146       | 0.083           |
| DS-14, $\beta_{07}$                          | -0.024309   | 0.082476 | -0.295          | 146       | 0.769           |
| Type A, $\beta_{08}$                         | -0.411583   | 0.360240 | -1.143          | 146       | 0.255           |
| For “Time” slope, $\pi_1$                    |             |          |                 |           |                 |
| INTERCEPT.2, $\beta_{10}$                    | -0.020728   | 0.016416 | -1.263          | 146       | 0.209           |
| Randomization Group, $\beta_{11}$            | 0.031297    | 0.032304 | 0.969           | 146       | 0.334           |
| Sex, $\beta_{12}$                            | -0.013578   | 0.036371 | -0.373          | 146       | 0.709           |
| Previous CVD, $\beta_{13}$                   | -0.050682   | 0.073246 | -0.692          | 146       | 0.490           |
| End Organ Damage, $\beta_{14}$               | -0.023079   | 0.011941 | -1.933          | 146       | 0.055           |
| Number of AHP drugs taken, $\beta_{15}$      | 0.191394    | 0.115431 | 1.658           | 146       | 0.099           |
| <b>STAI-Y Trait, <math>\beta_{16}</math></b> | -0.005535   | 0.002360 | <b>-2.345</b>   | 146       | <b>0.020</b>    |
| DS-14, $\beta_{17}$                          | 0.002398    | 0.002083 | 1.151           | 146       | 0.252           |
| Type A, $\beta_{18}$                         | 0.008773    | 0.008716 | 1.007           | 146       | 0.316           |
| For “Clinical SBP” slope, $\pi_2$            |             |          |                 |           |                 |
| INTERCEPT.2, $\beta_{20}$                    | 0.012636    | 0.034896 | 0.362           | 111       | 0.718           |
| For “Clinical DBP” slope, $\pi_3$            |             |          |                 |           |                 |
| INTERCEPT.2, $\beta_{30}$                    | -0.025529   | 0.048569 | -0.526          | 111       | 0.600           |
| For “Composite Risk Factor” slope, $\pi_4$   |             |          |                 |           |                 |
| INTERCEPT.2, $\beta_{40}$                    | 0.899202    | 0.555263 | 1.619           | 111       | 0.108           |
| For “ <b>Internal LoC</b> ” slope, $\pi_5$   |             |          |                 |           |                 |
| INTERCEPT.2, $\beta_{50}$                    | 0.275086    | 0.109723 | <b>2.507</b>    | 111       | <b>0.014</b>    |
| For “External LoC” slope, $\pi_6$            |             |          |                 |           |                 |
| INTERCEPT.2, $\beta_{60}$                    | -0.114461   | 0.070493 | -1.624          | 111       | 0.107           |

For “RSES” slope,  $\pi_7$

|                           |          |          |       |     |       |
|---------------------------|----------|----------|-------|-----|-------|
| INTERCEPT.2, $\beta_{70}$ | 0.224777 | 0.141846 | 1.585 | 111 | 0.116 |
|---------------------------|----------|----------|-------|-----|-------|

---

**Supplementary Table S3.**

Fixed effects of all predictors on **SF-36 MCS** at baseline (Intercept.2) and on its longitudinal changes over time (“Time” slope). The table further report the effects of the Time Varying Covariates (e.g., LoC and RSES) on the dependent variable.

| Fixed Effect                                 | Coefficient | SE       | <i>t</i> -ratio | <i>df</i> | <i>p</i> -value  |
|----------------------------------------------|-------------|----------|-----------------|-----------|------------------|
| For INTERCEPT.1, $\pi_0$                     |             |          |                 |           |                  |
| INTERCEPT.2, $\beta_{00}$                    | 45.648242   | 0.751742 | 60.723          | 146       | <0.001           |
| Randomization Group, $\beta_{01}$            | -0.677145   | 1.555237 | -0.435          | 146       | 0.664            |
| Sex, $\beta_{02}$                            | -0.528593   | 1.405244 | -0.376          | 146       | 0.707            |
| Previous CVD, $\beta_{03}$                   | 2.958204    | 2.816695 | 1.050           | 146       | 0.295            |
| End Organ Damage, $\beta_{04}$               | -0.031428   | 0.561186 | -0.056          | 146       | 0.955            |
| Number of AHP drugs taken, $\beta_{05}$      | -4.616898   | 5.037851 | -0.916          | 146       | 0.361            |
| <b>STAI-Y Trait, <math>\beta_{06}</math></b> | -0.494523   | 0.109127 | <b>-4.532</b>   | 146       | <b>&lt;0.001</b> |
| DS-14, $\beta_{07}$                          | 0.010591    | 0.093181 | 0.114           | 146       | 0.910            |
| Type A, $\beta_{08}$                         | -0.460294   | 0.340527 | -1.352          | 146       | 0.179            |
| For “Time” slope, $\pi_1$                    |             |          |                 |           |                  |
| INTERCEPT.2, $\beta_{10}$                    | 0.019687    | 0.020974 | 0.939           | 146       | 0.349            |
| Randomization Group, $\beta_{11}$            | 0.044133    | 0.041963 | 1.052           | 146       | 0.295            |
| Sex, $\beta_{12}$                            | 0.053351    | 0.038732 | 1.377           | 146       | 0.170            |
| Previous CVD, $\beta_{13}$                   | -0.083486   | 0.058486 | -1.427          | 146       | 0.156            |
| End Organ Damage, $\beta_{14}$               | 0.036291    | 0.011578 | 3.135           | 146       | 0.002            |
| Number of AHP drugs taken, $\beta_{15}$      | -0.156674   | 0.117773 | -1.330          | 146       | 0.185            |
| <b>STAI-Y Trait, <math>\beta_{16}</math></b> | 0.005570    | 0.002772 | <b>2.009</b>    | 146       | <b>0.046</b>     |
| DS-14, $\beta_{17}$                          | -0.002459   | 0.002435 | -1.010          | 146       | 0.314            |
| <b>Type A, <math>\beta_{18}</math></b>       | 0.020484    | 0.009026 | <b>2.269</b>    | 146       | <b>0.025</b>     |
| For “Clinical SBP” slope, $\pi_2$            |             |          |                 |           |                  |
| INTERCEPT.2, $\beta_{20}$                    | -0.035852   | 0.046793 | -0.766          | 111       | 0.445            |
| For “Clinical DBP” slope, $\pi_3$            |             |          |                 |           |                  |
| INTERCEPT.2, $\beta_{30}$                    | -0.069892   | 0.059192 | -1.181          | 111       | 0.240            |
| For “Composite Risk Factor” slope, $\pi_4$   |             |          |                 |           |                  |
| INTERCEPT.2, $\beta_{40}$                    | -0.777615   | 0.908070 | -0.856          | 111       | 0.394            |
| For “Internal LoC” slope, $\pi_5$            |             |          |                 |           |                  |
| INTERCEPT.2, $\beta_{50}$                    | 0.033244    | 0.113915 | 0.292           | 111       | 0.771            |
| For “ <b>External LoC</b> ” slope, $\pi_6$   |             |          |                 |           |                  |
| INTERCEPT.2, $\beta_{60}$                    | -0.130371   | 0.065575 | <b>-1.988</b>   | 111       | <b>0.049</b>     |
| For “ <b>RSES</b> ” slope, $\pi_7$           |             |          |                 |           |                  |
| INTERCEPT.2, $\beta_{70}$                    | 0.630425    | 0.126559 | <b>4.981</b>    | 111       | <b>&lt;0.001</b> |

*Note.* SE = Standard Error; *df* = degrees of freedom; CVD = Cardiovascular Disease; AHP = Anti-Hypertensive; STAI-Y = State Trait Anxiety Inventory, Trait subscale; DS-14 = Type

D Scale 14; SBP = Systolic Blood Pressure; DBP = Diastolic Blood Pressure; LoC = Locus of Control; RSES = Rosenberg Self-Esteem Scale.

**Supplementary Figure S1.**

Significant effects of trait anxiety on psychological well-being (PGWB) from baseline up to 48-weeks of follow-up.

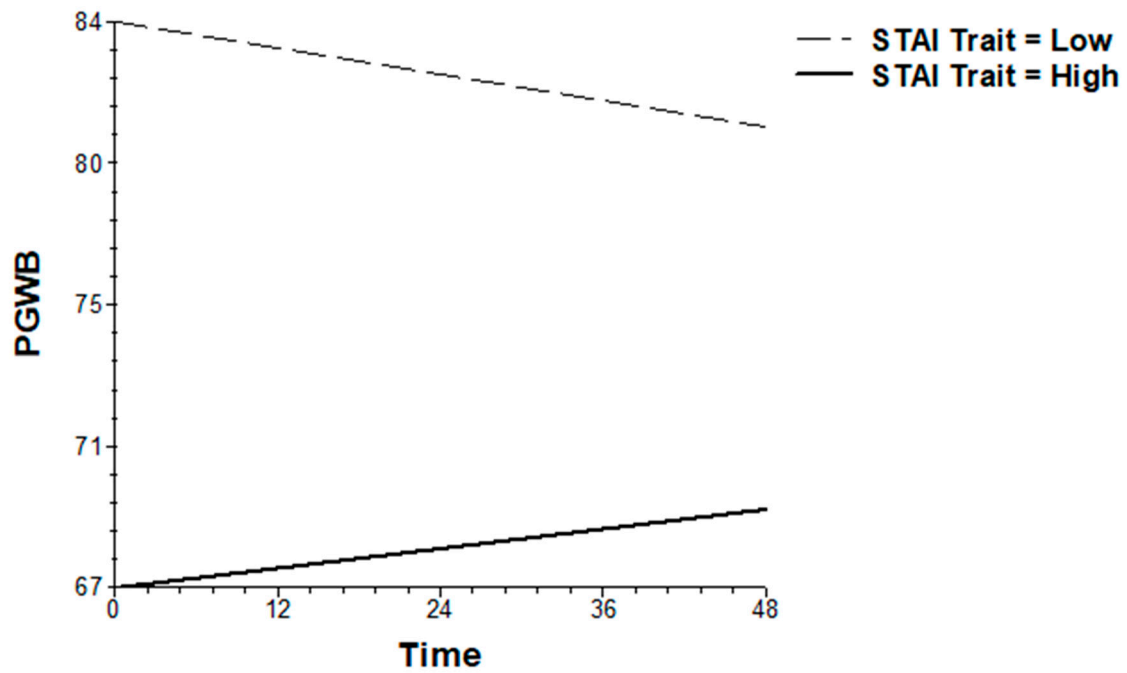



**Supplementary Figure S2.**

Significant effects of trait anxiety on health-related quality of life mental domain (SF-36 MCS) from baseline up to 48-weeks of follow-up.

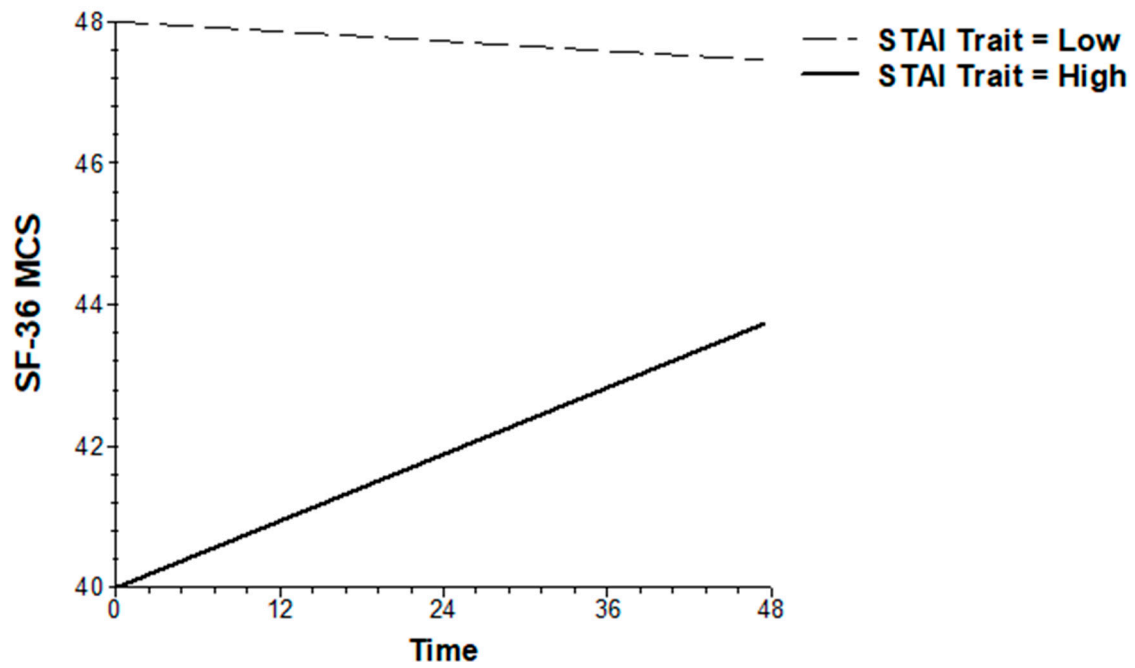

Supplement: s1 [file s1]
